# Supplementary material for: Normal radial migration and lamination are maintained in dyslexia-susceptibility candidate gene homolog Kiaa0319 knockout mice
Source: PubMed Central journal article supplement (PMC5368214; doi:10.1007/s00429-016-1282-1), 2016-08-10

# BRAIN STRUCTURE AND FUNCTION

## SUPPLEMENTARY INFORMATION

### **Normal radial migration and lamination are maintained in dyslexia-susceptibility candidate gene homolog *Kiaa0319* knockout mice**

Isabel Martinez-Garay<sup>1,2</sup>, Luiz G. Guidi<sup>1,3</sup>, Zoe G. Holloway<sup>3</sup>, Melissa A. G. Bailey<sup>1</sup>, Daniel  
Lyngholm<sup>1,4</sup>, Tomasz Schneider<sup>5</sup>, Timothy Donnison<sup>3</sup>, Simon J. B. Butt<sup>1</sup>, Anthony P.  
Monaco<sup>\*3,6</sup>, Zoltán Molnár<sup>\*1</sup>, Antonio Velayos-Baeza<sup>\*3</sup>

1. Department of Physiology, Anatomy, and Genetics, University of Oxford, Oxford, UK
2. Current address: Division of Neuroscience, School of Biosciences, Cardiff University, Cardiff, UK
3. Wellcome Trust Centre for Human Genetics, University of Oxford, Oxford, UK
4. Current address: Strathclyde Institute of Pharmacy and Biomedical Sciences, University of Strathclyde, Glasgow, UK
5. School of Pharmacy and Biomedical Sciences, University of Central Lancashire, Preston, UK
6. Current address: Tufts University, Medford, USA

\* Corresponding authors

A.V.-B.: Wellcome Trust Centre for Human Genetics, University of Oxford, Oxford, OX3 7BN, UK.  
Tel.: +44 (0)1865 287502. Fax.: +44 (0)1865 287501. Email: [avelayos@well.ox.ac.uk](mailto:avelayos@well.ox.ac.uk)

Z.M.: Department of Physiology, Anatomy, and Genetics, University of Oxford, Oxford, OX1 3QX, UK.  
Tel.: +44 (0)1865 282664. Fax.: +44 (0)1865 272420. Email: [Zoltan.Molnar@dpag.ox.ac.uk](mailto:Zoltan.Molnar@dpag.ox.ac.uk)

A.P.M.: Office of the President, Ballou Hall, Tufts University, Medford, MA 02155, USA. Tel.: 1 617  
627 3300. Fax.: 1 617 627 3555. Email: [anthony.monaco@tufts.edu](mailto:anthony.monaco@tufts.edu)

## SUPPLEMENTARY MATERIALS AND METHODS

### Generation of *Kiaa0319*-targeted mice

Mouse JM8.F6 embryonic stem cells (Pettitt et al. 2009) targeted at the *KIAA0319*-homologous mouse gene *D130043K22Rik* with a “knockout-first” (KO1, reporter-tagged insertion with conditional potential) allele (C57BL/6N-*D130043K22Rik*<sup>tm1a(KOMP)Wtsi</sup>) (Skarnes et al. 2011), generated under project CSD26319, were obtained from the Knock-Out Mouse Project (KOMP) repository at UC Davis, California ([www.komp.org](http://www.komp.org)). The acquired clones (EPD0073\_1\_C12, EPD0077\_5\_D04 and EPD0077\_5\_F04) had passed KOMP quality control tests and were confirmed to be around 75% euploid. These clones were used for albino C57BL/6J blastocyst injections at the Transgenics Core of the Wellcome Trust Centre for Human Genetics in Oxford (UK). Three male chimeras were obtained from *Kiaa0319*-KO1 ES cell clone D04 (~ 90%, 80% and 30% contribution from the injected ES cells), and one with clone C12 (~20% contribution). Germline transmission was determined for the D04-chimeras by the presence of black coated pups in litters breeding of male chimeras with albino C57BL/6J females or by genotyping. This was successful for the 90% and 80% chimeras, and both males were initially used for backcrossing into C57BL/6J background, but only mice derived from the 80% chimera were kept and used in this work. Subsequent C57BL/6J backcrossing was used to generate a “*Kiaa0319*-KO1” colony (C57BL/6J-*D130043K22Rik*<sup>tm1a(KOMP)Wtsi</sup>). *Kiaa0319*-NZ mice (C57BL/6J-*D130043K22Rik*<sup>tm1b(KOMP)Wtsi</sup>) carrying the *Kiaa0319* “Null-lacZ” (NZ) allele were obtained after removal of the promoter-driven *neo* cassette and floxed exon 6 by Cre-mediated recombination after crossing a *Kiaa0319*-KO1 male with B6.Cg-Tg(Sox2-cre)1Amc females (Hayashi et al. 2002; Vincent and Robertson 2003). *Kiaa0319*-Flx mice (C57BL/6J-*D130043K22Rik*<sup>tm1c(KOMP)Wtsi</sup>) carrying the *Kiaa0319* “floxed” (Flx) (conditional KO potential) allele were obtained after removal of the IRES:*lacZ* trapping cassette and promoter-driven *neo* cassette by FLPe-mediated recombination after crossing with B6.Cg-Tg(ACTFLPe)9205Dym/J mice (Rodriguez et al. 2000). *Kiaa0319*-Null mice (C57BL/6J-*D130043K22Rik*<sup>tm1d(KOMP)Wtsi</sup>) carrying the *Kiaa0319* “Null” allele were obtained after removal

of the floxed exon 6 by Cre-mediated recombination after crossing a *Kiaa0319-Flox* male with Sox2-cre females. Information about gene organisation and details of the targeting strategy are provided in Fig. S1. A detailed diagram of the different alleles is shown in Fig. S2. The expected effect of the trapping cassette in *KO1* and *NZ* alleles is to prevent normal splicing after exon 5, which will be joined to the *En2* exon present in the cassette, and resulting in a short chimeric protein (p.D374GfsX102) lacking the PKD, C6, transmembrane and cytoplasmic domains of KIAA0319 protein (Velayos-Baeza et al. 2007, 2008). The predicted result at the protein level from the *Null* allele is p.D374VfsX14 although the resulting transcript, unlike with the *KO1* and *NZ* alleles, would be expected to undergo degradation by nonsense-mediated mRNA decay (NMD) and no protein would be produced. C57BL/6J mice were obtained from Harlan Laboratories UK. Both FLPe and Sox2cre mouse lines were already available at the WTCHG animal facility, kept by backcrossing into C57BL/6J.

### **Custom anti-KIAA0319 antibodies**

Specific antiserum R7 against the C-terminal domain of mouse KIAA0319 protein has been previously described (Velayos-Baeza et al. 2010). Custom polyclonal rabbit antiserum R5 against the ectodomain of KIAA0319 was obtained from Eurogentec Ltd after immunisation with peptides [E+F] (residues 150-164, C+ PEETTEYSDEYKDLE, and 208-222, MEKLQDPTPHPLDQE+C, respectively, of the mouse KIAA0319 protein). Characterisation of reactivity in Western blotting and Immunofluorescence applications, including affinity-purified antibodies against each of the immunisation peptides and performed using overexpression of mouse and human proteins in mammalian cells, showed that only epitope F in the mouse protein was recognised and that only non-glycosylated protein seemed to be detected (results not shown). Therefore this antiserum is not able to recognise the endogenous, glycosylated, mouse KIAA0319 protein. However, transient overexpression of the KIAA0319 protein allows accumulation of non-modified protein that can be detected by the R5 antiserum.

**Cortical neuron cultures, nucleofection, and processing.** Cortical neuron cultures were performed as described in (Maximov et al. 2007) with minor modifications. Briefly, C57BL/6J E16.5 embryos were dissected and cortices digested in 6mg/ml trypsin (Sigma-Aldrich) at 37°C for 7 minutes. After inactivation of trypsin with serum-containing HBSS, tissue was dissociated using a P1000 tip. Following dissociation,  $5 \times 10^6$  cells/sample were nucleofected with plasmid DNA (4 µg) using the Amaxa Mouse Neuron Nucleofector system for primary Mouse Cortical Neurons (VPG-1001, program O-005). Transfected neurons were plated at  $1.5 \times 10^7$  cells/well on 90 mm plates pre-coated with 0.01% poly-L-lysine (Sigma-Aldrich) and 10 µg/ml laminin (Sigma-Aldrich), and cultured for 72 h at 37°C with 5%CO<sub>2</sub> in Neurobasal medium (Gibco) supplemented with 100 ug/ml insulin (Sigma-Aldrich), 100 ug/ml transferrin (Merck Chemicals), 1x B27 supplement (Gibco), 5% FBS serum (HyClone), 1% penicillin/streptomycin (Gibco) and 2 mM L-glutamine (Gibco). Cells were then collected after treatment with trypsin, washed with cold PBS, and used for DNA extraction (same protocol as described for ear notches) and protein lysate preparation by direct re-suspension in RIPA buffer (conditions as described in main text).

### **Behavioural tests**

Elevated Plus Maze (EPM). The test was essentially carried out as previously described (Ufartes et al. 2013). The maze consisted of 2 opposing open and 2 opposing closed arms. All arms were 30 cm long and 5 cm wide. Half the mice were placed in the EPM facing left and the other half facing right in the open arm and allowed to freely explore the apparatus over a 10-min trial. Animals were tracked using the AnyMaze System (Stoelting, USA). Entry into an arm of the EPM was defined using the entire animal with at least 70% of the animal being in the zone. The percentage of time spent in the open arms was calculated by dividing the time spent in the open arms by the combined time spent in open and closed arms. The percentage of open arm entries was also calculated.

Open field. Locomotor activity was measured using the PAS Home Cage system (San Diego Instruments, San Diego, CA, US). Mice were placed into a plexiglass cage with 4x8

photobeam configuration and tested over a period of 60 min. The total beam breaks were measured and divided into 10 minute time bins for analysis.

Locomotor habituation. Locomotor habituation to the increasingly familiar environment was assessed using a computer controlled system (TSE-Systems, Bad Homburg, Germany). Mice were exposed 3 times for 10 minutes to the same rectangular Plexiglas cage [35 cm (w) × 20 cm (d) × 20 cm (h)] inserted into the TSE-System with 1 hour interval between exposures. Cages were cleaned with water and alcohol between animals. Animals' locomotor activity was automatically scored by the photobeam system (15x15 beams); decrease in distance travelled was used as a measure of habituation.

Rotarod. The acceleration rotarod was carried out as described (Ufartes et al. 2013). Mice were given 3 trials per session and 3 sessions per day with a 60-min intersession interval. Mean speed at fall from three consecutive trials was used as a measure of motor coordination. If a mouse failed to grip in three times in the initial 10 s/4rpm period it was excluded.

Inverted screen, Grip strength, Spatial novelty (Y maze) and Social behaviour / social memory. Tests were performed as described (Ufartes et al. 2013).

Spontaneous alternations (T maze). The apparatus and method have been described (Ufartes et al. 2013). Each mouse received 6 trials over 2 sessions. The inter-session interval was 80 minutes. The percentage of passes over 6 trials was calculated to indicate the degree to which the mouse explored a different goal arm to the previous run (alternation).

Object recognition. Med Associates activity chambers (ENV-510) were used containing a black Perspex box (27 x 27 cm) insert. The objects were metal brackets glued to 5 x 5 cm metal bases and novel and familiar objects were similar in size, approximately 6.5-8.5 cm x 3.5-4 cm. During testing, the objects were placed 4 cm from the middle part of the walls to allow investigation around the object. Tests were recorded and analyzed by the AnyMaze System (Stoelting, USA). The test consisted of three sessions. During session 1 (habituation phase) the mouse was allowed to freely explore in an empty open field arena for 10 minutes

and locomotor activity was assessed. During session 2 (exposure phase), two identical objects were placed in the arena and the mouse freely allowed to investigate the objects. Response to object novelty was examined during session 3 (test phase) by replacing one of the familiar with a novel object and the mouse was allowed to explore. Session 2 and 3 were 5 min in duration and were separated by a 3-min inter-trial interval (ITI) where the mouse was placed in a holding cage next to the testing box. During this period, the box and objects were wiped with water and 70% alcohol. The duration and frequency of object exploration during each session was recorded and response to object novelty was assessed by comparing the time spent in contact with the novel object versus the time spent in contact with the familiar object. Object exploration was scored only when the mouse's head was in contact with the object. The position of the novel and familiar objects were counterbalanced. A performance ratio was calculated (novel/novel+familiar) where 0.5 denotes equal object preference whilst higher or lower denotes a preference for novel or familiar respectively.

Light/dark box. The test was performed as previously described (Schneider et al. 2012) in Med Associates activity chambers (ENV-510). The dark box insert was made of black Perspex designed to cover half the area of the activity chamber (27 x 13.9 x 21.5 cm) with a 4 x 4 cm hole placed in the middle of the wall at floor level. Time spent in and latency to enter light and dark zones as well as the number of full-body transitions between the light (300 lux) and dark (2 lux) compartments were automatically scored by Med Associates activity software. Animals were started in the light compartment; the session lasted 10 minutes.

Pre-pulse inhibition of acoustic startle. Startle response and pre-pulse inhibition of acoustic startle responses were measured by the SR-Lab System (San Diego Instruments, San Diego, CA, USA). The mouse was placed in a Plexiglas cylinder and left to acclimatise for 5 min with constant 65dB sound (background noise). A test session contained ten periods in which the trial stimuli were included in pseudorandom order so that they appeared once within each period of 12 trial stimuli: startle stimulus (40 ms, 120 dB sound burst), pre-pulse stimulus (20 ms, 81 dB), baseline stimulus (20 ms, 65 dB, to measure baseline movement in

the cylinders), and 9 combinations of pre-pulse and startle stimuli (“pre-pulse-plus-pulse”) spaced by either 10, 20, 30, 40, 50, 100, 200, 400, 800 ms delays, starting at the end of the pre-pulse stimulus. The test session started and finished with five startle stimuli. The average inter-trial interval was 15 s (ranged from 10 to 20 s). The startle response was recorded every 1 ms during a 65 ms sampling window starting with the onset of the startle stimulus or the 81dB pre-pulse alone stimulus. The following formula was used to calculate the percentage of pre-pulse inhibition of a startle response:  $100 - \left( \frac{\text{“pre-pulse-plus-pulse”}}{\text{“pulse-alone”}} \right) \times 100$ .

Unistat 6.5 (Unistat Ltd, London, UK) software was used to perform statistical data analysis using one way one or two-way analysis of variance (ANOVA). To follow up, post-hoc analysis using Bonferroni-modified least significant difference was used. When animals were tested multiple times in the same task or within session periods were used, ANOVA with repeated measures was applied.

## **SUPPLEMENTAL REFERENCES**

- Hayashi S, Lewis P, Pevny L, McMahon AP (2002) Efficient gene modulation in mouse epiblast using a Sox2Cre transgenic mouse strain. *Mech Dev* 119 Suppl 1:S97-S101. doi: 10.1016/S0925-4773(03)00099-6
- Lambert JF, Benoit BO, Colvin GA, et al (2000) Quick sex determination of mouse fetuses. *J Neurosci Methods* 95:127-132. doi: 10.1016/S0165-0270(99)00157-0
- Maximov A, Pang ZP, Tervo DGR, Sudhof TC (2007) Monitoring synaptic transmission in primary neuronal cultures using local extracellular stimulation. *J Neurosci Methods* 161:75-87. doi: 10.1016/j.jneumeth.2006.10.009
- Pettitt SJ, Liang Q, Rairdan XY, et al (2009) Agouti C57BL/6N embryonic stem cells for mouse genetic resources. *Nat Methods* 6:493-495. doi: 10.1038/nmeth.1342
- Rodriguez CI, Buchholz F, Galloway J, et al (2000) High-efficiency deleter mice show that FLPe is an alternative to Cre-loxP. *Nat Genet* 25:139-140. doi: 10.1038/75973
- Vincent SD, Robertson EJ (2003) Highly efficient transgene-independent recombination directed by a maternally derived SOX2CRE transgene. *Genesis* 37:54-56. doi: 10.1002/gene.10226

## SUPPLEMENTARY FIGURE LEGENDS, TABLES AND FIGURES

**Fig. S1** *Kiaa0319* gene organisation and targeting strategy. **a** Details of gene organisation, obtained from Ensembl ([www.ensembl.org](http://www.ensembl.org)). Exon 6 is targeted with a “knock-out first” cassette (KOMP project CSD26319). **b** The regions present in the different alleles are described, showing start and end positions using first position of the start codon as position +1

**Fig. S2** Generation of *Kiaa0319*-targetted mice. **a** Detailed schematic representation of strategy followed for targeting the *Kiaa0319* gene. Two regions flanking exon 6 were replaced by a trapping cassette (containing two FRT sites (F1, F2) and two loxP sites (P1, P2)) and a loxP-cassette (containing a third loxP site (P3)), respectively, to obtain a “knock-out first” (*tm1a* or KO1) allele. After recombination with Cre, the region between sites P1 and P3 is deleted to obtain a “Null-lacZ” (*tm1b* or NZ) allele. Deletion of region between sites F1 and F2 by Flp recombination generates a “floxed” (*tm1c* or Flx) allele with conditional knock-out potential: a “Null” (*tm1d* or Null) allele where exon 6 is deleted can be generated after Cre recombination between sites P2 and P3. Long-range PCR fragments (KO1-1 to KO1-4) used for target confirmation and sequencing, and the PCRs used for identification of the different alleles (genotyping) are shown. Details about elements in the targeting cassette and the different PCRs are shown in Fig. S3 and S4. **b** Results of long-range PCRs from KO1 homozygous mice obtained from two different male chimeras (80% and 90%). DNA ladder sizes are shown on the right. **c** Results obtained with genotyping PCRs from mice homozygous for wild type (ww), KO1 (aa), NZ (bb), Flx (cc) or Null (dd) alleles; heterozygous Flx (cw) also included to show double band with KWF. Size of each fragment (bp) is shown on the right. **d** Western blotting analysis from different organ lysates from 6-week old mice with specific antiserum R7 shows a heterogeneous band pattern in wild type (wt) samples (left panel). The same pattern is maintained in samples from homozygous NZ mice (middle and right panels) except for a band of ~170kDa (*white asterisk*), the expected size for



glycosylated full-length KIAA0319 protein, in brain and cerebellum (and possibly testis) samples. 30 µg (left panel) or 50 µg (middle and right panels) total protein loaded per lane. Br, brain; Li, liver; Ki, kidneys; Sp, spleen; Lu, lungs; He, heart; Te, testis

**Fig. S3** Sequence of *Kiaa0319-KO1* allele. The region between primers GF1 and GR1 of the “knockout first” allele for *Kiaa0319* gene is provided. Important regions, elements of the targeting cassette and primers used for genotyping and PCR amplification (see Fig. S2 and Table S1) are shown. Forward primers are underlined and named on the left side; reverse primers are in bold and named on the right side; name of primers used for amplification of the overlapping PCR fragments KO1-1 to KO1-4 are colour-highlighted. After sequencing these long-range PCR fragments we only found 3 differences (*yellow highlighted*) with the expected sequence, none of which affected any critical element: an extra A at the IRES element, an extra G at the b-actin promoter (position -354/5 upstream the Neo resistance gene), and an extra G in intron 6 (position +151/2) of the *Kiaa0319* gene

**Fig. S4** PCR and genotyping details. Primer combinations and expected fragment sizes for long-range, genotyping and sex-determination PCRs used in this work, as well as the general genotyping amplification profile, are described. Schematic representation of genotyping results for each PCR is presented for each possible genotype for the *Kiaa0319* locus; (+), amplification; (-), no amplification; when two fragments can be amplified, the larger one is denoted as [+]

**Fig. S5** Normal lamination in early developmental stages. **a** Immunostaining of cortical sections of *Kiaa0319* +/+, +/- and -/- embryos at E15.5 with anti-Ctip2 (green). **b** Immunostaining of cortical sections of *Kiaa0319* +/+, +/- and -/- embryos at E18.5 with anti-Ctip2 (green) and anti-Cux1 (red). No differences are detected between the three genotypes. Nuclei were stained with DAPI (blue). VZ, ventricular zone; SVZ, subventricular zone; IZ, intermediate zone; CP, cortical plate. Scale bars = 75 µm

**Fig. S6** Generation of *Null* allele by Cre expression in *Flx* electroporated cells. **a**

Representative immunostaining image showing expression of Cre in transfected cells.

Embryos from homozygous (F/F) floxed animals were electroporated *in utero* at E14.5 with pCIG-Cre. Transfected cells express EGFP (green) and stain with an anti-Cre antibody (red).

Scale bar = main image, 100  $\mu$ m; insets, 50  $\mu$ m. **b** Detection of *Kiaa0319 Flx* (*tmc1*, F)

and/or *Null* (*tmd1*, N) alleles with PCR KNF (see Fig. S2c). Primary neuronal cultures from

homozygous (F/F) floxed embryos were transfected *in vitro* with pCIG-Cre (CRE) or the

control plasmid pCIG (cntr). *Null* allele is detected in the Cre-transfected culture but not in

control, where only *Flx* allele is detected. DNA samples from heterozygous *Null* (wt/N) and

homozygous *Flx* (F/F) mice were used as controls. **c** Western blotting analysis of neuronal

cultures described in **b** shows a reduced level of KIAA0319 protein (*arrow*) in Cre-

transfected cells. Analysis of brain lysates from wild type (wt/wt), heterozygous (wt/N) and

homozygous (N/N) *Null* mice at postnatal day 2 (P2) confirms the expected knock-out effect

of this allele, with KIAA0319 protein completely absent in homozygous N/N mice. Lower

bands are unspecific signal as shown in Fig. 1 and Fig. S2d

**Fig. S7** Behavioural characterisation of *Kiaa0319* mutant mice. No difference in performance

was observed between *Kiaa0319* homozygous (-/-) or heterozygous (+/-) and wild type (+/+)

controls in a number of locomotor, strength and learning and memory tests: **a** locomotor

activity in open field; **b** social approach task, preference for social novelty; **c** locomotor

habituation; **d** inverted screen; **e** weight lifting; **f** motor coordination and learning in rotarod; **g**

spontaneous alternations in T maze; **h** spatial novelty in Y maze; **i** object recognition. All

data shown are mean  $\pm$  s.e.m. Number of animals analysed for each genotype per test as

shown in Table S3

**Table S1** Primers used in this work

| Primer Name   | Primer Sequence                     | Reverse complementary to              | location            | Start position in <i>Kiaa0319</i> alleles / comments |            |               |               |                                                                                  |
|---------------|-------------------------------------|---------------------------------------|---------------------|------------------------------------------------------|------------|---------------|---------------|----------------------------------------------------------------------------------|
|               |                                     |                                       |                     | Wild type                                            | KO1 (tm1a) | Null-Z (tm1b) | Floxed (tm1c) | Null (tm1d)                                                                      |
| mKi2F3 (GF3)  | CATGTCATGTGTGTCATGCATATATGTGC       |                                       | intron 2            | 1825                                                 | 1825       | 1825          | 1825          | 1825                                                                             |
| mKi2F4 (GF4)  | GTCATGTGTGTCATGCATATATG             |                                       | intron 2            | 1828                                                 | 1828       | 1828          | 1828          | 1828                                                                             |
| mK3F2 (GF2)   | CTACAGCTACAGGAGACAACCTCAG           |                                       | exon 3              | 2686                                                 | 2686       | 2686          | 2686          | 2686                                                                             |
| mKi3F1 (GF1)  | CAGACTCTTTCAGGCTAGAGGAAC            |                                       | intron 3            | 2988                                                 | 2988       | 2988          | 2988          | 2988                                                                             |
| mK5F          | TTGCTGTGTCTGCTGGAGAT                |                                       | exon 5              | 8147                                                 | 8147       | 8147          | 8147          | 8147                                                                             |
| mKi5F1        | GCATTCTCTGAGCCACTACC                |                                       | intron 5            | 8284                                                 | 8284       | 8284          | 8284          | 8284                                                                             |
| SA-F1         | AAGGCGCATAACGATACCAC                |                                       | 5'FRT(1)            |                                                      | 8618       | 8618          | 8618          | 8618                                                                             |
| LAR3          | CACAACGGGTTCTTCTGTAGTCC             | GGACTAACAGAAGAACCCTGTGTG              | En-2 intron         |                                                      | 8821       | 8821          |               |                                                                                  |
| lacZ-F3       | AATCGCCTTGACGACATCC                 |                                       | lacZ                |                                                      | 10443      | 10443         |               |                                                                                  |
| lacZ-R3       | GTTC AAC CACCGCACGATAG              | CTATCGTGCGGTGGTTGAAC                  | lacZ                |                                                      | 11313      | 11313         |               |                                                                                  |
| lacZ-F8       | AATCAGGCCACGGCCTAAT                 |                                       | lacZ                |                                                      | 11752      | 11752         |               |                                                                                  |
| lacZ-R5       | GACATCCAGAGGCACTTCAC                | GTGAAGTGCCTCTGGATGTC                  | lacZ                |                                                      | 12386      | 12386         |               |                                                                                  |
| lacZ-F1       | TGGCGAGCGATACACCGC                  |                                       | lacZ                |                                                      | 12985      | 12985         |               |                                                                                  |
| lacZ-R7       | AGGAGTCGTCGCCACCAATC                | GATTGGTGGCGACGACTCCT                  | lacZ                |                                                      | 13365      | 13365         |               |                                                                                  |
| lacZ-F2       | GCCCGTCAGTATCGGCGG                  |                                       | lacZ                |                                                      | 13369      | 13369         |               |                                                                                  |
| PNF           | ATCCGGGGTACC GCGTCGAG               |                                       | 5'FRT(2)            |                                                      | 15566      |               |               |                                                                                  |
| R2R           | TCTATAGTCG CAGTAGGCGG               |                                       | 3'loxP(2)           |                                                      | 15720      |               | 8816          |                                                                                  |
| mKi5F3        | CGGACCTAGTGAGGTTGAAG                |                                       | target, intron 5    | 8679                                                 | 15743      |               | 8839          |                                                                                  |
| mKi5R3        | GAATCTCCGGTCTCTGTGTC                | GACACAGAGACCGGAGATTC                  | target, intron 5    | 8961                                                 | 16025      |               | 9121          |                                                                                  |
| mKi6R1        | GCAGGCACATGCCATCCATC                | GATGGATGGCATGTGCCTGC                  | target, intron 6    | 9318                                                 | 16382      |               | 9478          |                                                                                  |
| loxP3R        | GATGGCGAGCTCAGACCATA                | TATGGTCTGAGCTCGCCATC                  | 3'loxP(3)           |                                                      | 16507      | 13779         | 9603          | 8786                                                                             |
| mKi6R2        | CATCCATCTGCCTGATTGAG                | CTCAATCAGGCAGATGGATG                  | intron 6, replaced  | 9463                                                 |            |               |               |                                                                                  |
| mKi6R3        | GGAGCCAAGGAAGTGGTATG                | CATACCATTCTCTGGCTCC                   | intron 6            | 9711                                                 | 16744      | 14016         | 9840          | 9023                                                                             |
| mKi6R4        | CAATGACGTGAGCTGGTAAG                | CTTACCAGCTCAGTCAATTG                  | intron 6            | 9803                                                 | 16836      | 14108         | 9932          | 9115                                                                             |
| mKi8R9 (GR2)  | CCAGTAGTGGAGAAGAGGCTGTG             | CACAGCCTCTTCTCCACTACTGG               | intron 8            | 14657                                                | 21690      | 18962         | 14786         | 13969                                                                            |
| mKi8R10 (GR4) | GTGGTACAGTGCTTAACCTCCATGCATGTG      | CACATGCATGGAAGTTAAGCACTGTACCAC        | intron 8            | 14705                                                | 21738      | 19010         | 14834         | 14017                                                                            |
| mKi8R11 (GR1) | GCACGTTGAAGTCACGTTGAAGAG            | CTCTTCAACGTGACTTCAACGTGC              | intron 8            | 15907                                                | 22940      | 20212         | 16036         | 15219                                                                            |
| mKi8R12 (GR3) | GACTAGACACTCACCTTGGTGACATGC         | GCATGTCACCAAGGTGAGTGTCTAGTC           | intron 8            | 16084                                                | 23117      | 20389         | 16213         | 15396                                                                            |
| Cre-F2        | GGTCGATGCAACGAGTGATG                |                                       | Cre                 |                                                      |            |               |               |                                                                                  |
| Cre-F3        | AGGCGTTTTCTGAGCATAACC               |                                       | Cre                 |                                                      |            |               |               |                                                                                  |
| Cre-R2        | GATCCGCCGCATAACCACTG                | CACTGGTTATGCGGCGGATC                  | Cre                 |                                                      |            |               |               |                                                                                  |
| Cre-R5        | TCGGATCATCAGCTACACCA                | TGGTGTAGCTGATGATCCGA                  | Cre                 |                                                      |            |               |               |                                                                                  |
| Cre-R6        | TCCAGACCAGGCCAGGTATC                | GATACCTGGCCTGGTCTGGA                  | Cre                 |                                                      |            |               |               |                                                                                  |
| AGp-F2        | AGAGCCTCTGCTAACCATGT                |                                       | Intron, AG promoter |                                                      |            |               |               | $\beta$ -actin/ $\beta$ -globin promoter, between Sox2 enhancer/promoter and Cre |
| oIMR7338      | CTAGGCCACAGAATTGAAAGATCT            |                                       | IL2, exon 3         |                                                      |            |               |               | Internal Positive Control, JAX Tg(ACTFLPe)9205Dym protocol                       |
| oIMR7339      | GTAGGTGAAAATCTAGCATCATCC            | GGATGATGCTAGAATTTCCACCTAC             | IL2, intron 3       |                                                      |            |               |               | Internal Positive Control, JAX Tg(ACTFLPe)9205Dym protocol                       |
| oIMR1348      | CACCTGATATTGTAAGTAGTTTGC            |                                       | FLP1                |                                                      |            |               |               | FLP1, +348 to +370, JAX Tg(ACTFLPe)9205Dym protocol                              |
| oIMR1349      | CTAGTGCGAAGTAGTGATCAGG              | CCTGATCACTACTTCGCACTAG                | FLP1                |                                                      |            |               |               | FLP1, +1072 to +1051, JAX Tg(ACTFLPe)9205Dym protocol                            |
| mSry-F1       | ATACAGAGATCAGCAAGCAGC               |                                       | Sry, exon 1         |                                                      |            |               |               | Mouse Sry locus, +95 to +115                                                     |
| mSry-R1       | GTGTGCAGCTCTACTCCAGTC               | GACTGGAGTAGAGCTGCACAC                 | Sry, exon 1         |                                                      |            |               |               | Mouse Sry locus, +366 to +346                                                    |
| mSry-F        | TGGGACTGGTGACAATTGTC                |                                       | Sry, promoter       |                                                      |            |               |               | Mouse Sry locus, -28 to -9 (Lambert et al. 2000)                                 |
| mSry-R        | GAGTACAGGTGTGCAGCTCT                | AGAGCTGCACACCTGTACTC                  | Sry, exon 1         |                                                      |            |               |               | Mouse Sry locus, +374 to +355 (Lambert et al. 2000)                              |
| mIL3-F        | GGGACTCCAAGCTTCAATCA                |                                       | IL3, exon 1         |                                                      |            |               |               | Mouse IL3 gene, 792–801 (Lambert et al. 2000)                                    |
| mIL3-R        | TGGAGGAGGAAGAAGCAA                  | TTGCTTTTCTCCTCCTCCA                   | IL3, intron 2       |                                                      |            |               |               | Mouse IL3 gene, 1335–1316 (Lambert et al. 2000)                                  |
| mKiaa-F-XhoI  | AAGCTCGAGGTGAGGCAGAATGTGTCCCCAC     |                                       |                     |                                                      |            |               |               | for generation of pCIG-mKiaa0319, from position -10                              |
| mKiaa-R-EcoRI | CATGAATCTTACTATCTGTCTTTGAGTAGTAACCG | CGGTTACTACTCAAAGGACAGATAGTAAGAATTCATG |                     |                                                      |            |               |               | for generation of pCIG-mKiaa0319, until stop codon                               |
| Cre-F-XhoI    | ACTCTCGAGGAGAACCACATGGGCCCAAG       |                                       |                     |                                                      |            |               |               | for generation of pCIG-Cre                                                       |
| Cre-R-EcoRI   | CCAGAATCTCTACTAATCGCCATCTTCCAGCAG   | CTGCTGGAAGATGGCGATTAGTGAGAATTTCTGG    |                     |                                                      |            |               |               | for generation of pCIG-Cre                                                       |

All primers used in PCR, sequencing and cloning are described; for "reverse" primers, the reverse complementary sequence is also provided

Primers in genomic region around mouse *Kiaa0319* (*D130043K22Rik*) exon 6 in different alleles are shown in the top section of the table; these primers are also described in Figure S2

For each primer, the position of their first nt in the different *Kiaa0319* alleles (taking A in ATG codon as position +1) is shown

Primers described in KOMP project CSD26319 appear in red

**Table S2** Primary antibodies used in Immunostaining experiments

| <b>Antibody</b>                     | <b>Species</b>    | <b>Dilution</b> | <b>Company</b>              | <b>Cat.#</b> |
|-------------------------------------|-------------------|-----------------|-----------------------------|--------------|
| anti-Pax6                           | rabbit polyclonal | 1:200           | Covance                     | PRB-278P     |
| anti-TBR2                           | rabbit polyclonal | 1:500           | Abcam                       | ab23345      |
| anti-pH3 (Histone H3 (phospho S10)) | mouse monoclonal  | 1:2000          | Abcam                       | ab14955      |
| anti-Ki67                           | rabbit polyclonal | 1:1000          | Abcam                       | ab15580      |
| anti-Ctip2 [25B6]                   | rat monoclonal    | 1:500           | Abcam                       | ab18465      |
| anti-Cux1 [CDP (M-222)]             | rabbit polyclonal | 1:200           | Santa Cruz<br>Biotechnology | sc-13024     |
| anti-NF-H (Neurofilament H) [SMI32] | mouse monoclonal  | 1:2500          | Covance                     | SMI-32P      |
| anti-Calbindin D-28k                | rabbit polyclonal | 1:2000          | Swant                       | CB38         |
| anti-NeuN [A60]                     | mouse monoclonal  | 1:100           | Chemicon                    | MAB377       |
| anti-KIAA0319 [R5]                  | rabbit polyclonal | 1:1000          | Custom                      | This work    |

**Table S3** Number of mice used per test in behavioural analysis

| Test                                                  | Males |     |     | Females |     |     | Total |
|-------------------------------------------------------|-------|-----|-----|---------|-----|-----|-------|
|                                                       | WT    | Het | Hom | WT      | Het | Hom |       |
| Elevated Plus Maze                                    | 8     | 9   | 8   | 9       | 8   | 6   | 48    |
| Open Field                                            | 8     | 9   | 8   | 9       | 8   | 6   | 48    |
| Locomotor Habituation                                 | 8     | 9   | 8   | 9       | 8   | 6   | 48    |
| Rotarod                                               | 8     | 8   | 6   | 9       | 8   | 6   | 45    |
| Inverted Screen                                       | 8     | 9   | 8   | 9       | 8   | 6   | 48    |
| Grip strength / Weight Lifting                        | 8     | 9   | 8   | 9       | 8   | 6   | 48    |
| Spontaneous Alternations (T-maze)                     | 8     | 9   | 8   | 8       | 8   | 6   | 47    |
| Spatial Novelty (Y-maze)                              | 8     | 9   | 8   | 8       | 8   | 6   | 47    |
| Object Recognition                                    | 8     | 9   | 8   | 8       | 8   | 6   | 47    |
| Light/Dark Box                                        | 8     | 9   | 8   | 8       | 8   | 6   | 47    |
| Social Behaviour                                      | 8     | 9   | 8   | 8       | 8   | 6   | 47    |
| Auditory Sensorimotor Gating<br>(Prepulse Inhibition) | 7     | 8   | 7   | 7       | 4   | 6   | 39    |

Note: Maximum number of animals appears in top row. Lower numbers, shown in blue, were used when animals died (1 wt female) or were excluded from analysis (3 mice excluded for Rotarod after failing the initial grip test; 8 animals excluded for Auditory Sensorimotor Gating for being deaf (score less than 50 in reaction to 120 dB))

**Fig. S1** Structure of mouse *Kiaa0319* (D130043K22Rik) gene and generation of targetted alleles

**a**

Genome assembly: GRCm38.p4 (GCA\_000001635.6)  
 MGI transcript name: D130043K22Rik-001  
 Gene: RIKEN cDNA D130043K22 gene [MGI:3036268]  
 Ensembl Gene: ENSMUSEG00000006711  
 Location: Chromosome 13: 24,845,135-24,901,270  
 Ensembl Transcript: ENSMUST00000006893  
 Ensembl Protein: ENSMUSP00000006893  
 Strand: Forward  
 Base pairs: 4,973 24,854,501 ATG codon start position (exon 2)  
 Amino acids: 1,081

| No. | Exon / Intron          | Start      | End        | Phase |     | Length | Length | region | Size in allele |       |
|-----|------------------------|------------|------------|-------|-----|--------|--------|--------|----------------|-------|
|     |                        |            |            | Start | End |        |        |        | WT             | KO1   |
| 1   | 5' upstream sequence   | 24,845,135 | 24,845,299 | -     | -   | 165    |        |        |                |       |
|     | Intron 1-2             | 24,845,300 | 24,854,409 |       |     | 9,110  |        |        |                |       |
| 2   | ENSMUSE00000251843     | 24,854,410 | 24,854,555 | -     | 1   | 146    |        |        |                |       |
|     | Intron 2-3             | 24,854,556 | 24,856,651 |       |     | 2,096  |        |        |                |       |
| 3   | ENSMUSE00000251832     | 24,856,652 | 24,857,427 | 1     | 0   | 776    |        |        |                |       |
|     | Intron 3-4             | 24,857,428 | 24,857,920 |       |     | 493    |        |        |                |       |
| 4   | ENSMUSE00000251824     | 24,857,921 | 24,858,110 | 0     | 1   | 190    |        |        |                |       |
|     | Intron 4-5             | 24,858,111 | 24,858,122 |       |     | 12     |        |        | WT             | KO1   |
|     |                        | 24,858,123 | 24,862,637 |       |     | 4,527  | 4,515  | 5'arm  | 4,995          | 4,995 |
| 5   | ENSMUSE00000251814     | 24,862,638 | 24,862,736 | 1     | 1   | 99     | 99     |        |                |       |
|     | Intron 5-6             | 24,862,737 | 24,863,117 |       |     | 381    | 381    |        |                |       |
|     |                        | 24,863,118 | 24,863,175 |       |     | 58     | 58     | target | 694            | 694   |
|     |                        | 24,863,176 | 24,863,593 |       |     | 418    | 418    |        |                |       |
| 6   | ENSMUSE00000251805     | 24,863,594 | 24,863,691 | 1     | 0   | 98     | 98     |        |                |       |
|     | Intron 6-7             | 24,863,692 | 24,863,869 |       |     | 178    | 178    | 3'arm  | 5,094          | 5,094 |
|     |                        | 24,863,870 | 24,863,980 |       |     | 111    | 111    |        |                |       |
|     |                        | 24,863,981 | 24,864,732 |       |     | 752    | 752    |        |                |       |
| 7   | ENSMUSE00000251799     | 24,864,733 | 24,864,820 | 0     | 1   | 88     | 88     |        |                |       |
|     | Intron 7-8             | 24,864,821 | 24,867,088 |       |     | 2,268  | 2,268  |        |                |       |
| 8   | ENSMUSE00000117107     | 24,867,089 | 24,867,181 | 1     | 1   | 93     | 93     |        |                |       |
|     | Intron 8-9             | 24,867,182 | 24,869,074 |       |     | 1,893  | 1,893  |        |                |       |
|     |                        | 24,869,075 | 24,871,253 |       |     | 2,179  | 2,179  |        |                |       |
| 9   | ENSMUSE00000251779     | 24,871,254 | 24,871,386 | 1     | 2   | 133    | 133    |        |                |       |
|     | Intron 9-10            | 24,871,387 | 24,872,218 |       |     | 832    | 832    |        |                |       |
| 10  | ENSMUSE00000571452     | 24,872,219 | 24,872,447 | 2     | 0   | 229    | 229    |        |                |       |
|     | Intron 10-11           | 24,872,448 | 24,875,908 |       |     | 3,461  | 3,461  |        |                |       |
| 11  | ENSMUSE00000117117     | 24,875,909 | 24,876,032 | 0     | 1   | 124    | 124    |        |                |       |
|     | Intron 11-12           | 24,876,033 | 24,877,934 |       |     | 1,902  | 1,902  |        |                |       |
| 12  | ENSMUSE00000117119     | 24,877,935 | 24,878,067 | 1     | 2   | 133    | 133    |        |                |       |
|     | Intron 12-13           | 24,878,068 | 24,879,595 |       |     | 1,528  | 1,528  |        |                |       |
| 13  | ENSMUSE00000117112     | 24,879,596 | 24,879,744 | 2     | 1   | 149    | 149    |        |                |       |
|     | Intron 13-14           | 24,879,745 | 24,880,769 |       |     | 1,025  | 1,025  |        |                |       |
| 14  | ENSMUSE00001227905     | 24,880,770 | 24,880,921 | 1     | 0   | 152    | 152    |        |                |       |
|     | Intron 14-15           | 24,880,922 | 24,882,540 |       |     | 1,619  | 1,619  |        |                |       |
| 15  | ENSMUSE00000117111     | 24,882,541 | 24,882,679 | 0     | 1   | 139    | 139    |        |                |       |
|     | Intron 15-16           | 24,882,680 | 24,883,740 |       |     | 1,061  | 1,061  |        |                |       |
| 16  | ENSMUSE00001210728     | 24,883,741 | 24,883,900 | 1     | 2   | 160    | 160    |        |                |       |
|     | Intron 16-17           | 24,883,901 | 24,885,577 |       |     | 1,677  | 1,677  |        |                |       |
| 17  | ENSMUSE00001304380     | 24,885,578 | 24,885,720 | 2     | 1   | 143    | 143    |        |                |       |
|     | Intron 17-18           | 24,885,721 | 24,887,835 |       |     | 2,115  | 2,115  |        |                |       |
| 18  | ENSMUSE00001291388     | 24,887,836 | 24,887,958 | 1     | 1   | 123    | 123    |        |                |       |
|     | Intron 18-19           | 24,887,959 | 24,889,823 |       |     | 1,865  | 1,865  |        |                |       |
| 19  | ENSMUSE00001299407     | 24,889,824 | 24,889,914 | 1     | 2   | 91     | 91     |        |                |       |
|     | Intron 19-20           | 24,889,915 | 24,893,360 |       |     | 3,446  | 3,446  |        |                |       |
| 20  | ENSMUSE00001205600     | 24,893,361 | 24,893,452 | 2     | 1   | 92     | 92     |        |                |       |
|     | Intron 20-21           | 24,893,453 | 24,899,620 |       |     | 6,168  | 6,168  |        |                |       |
| 21  | ENSMUSE00000780261     | 24,899,621 | 24,901,270 | 1     | -   | 1,650  | 1,650  |        |                |       |
|     | 3' downstream sequence |            |            |       |     |        |        |        |                |       |

24,899,799 Stop codon end position (exon 21)

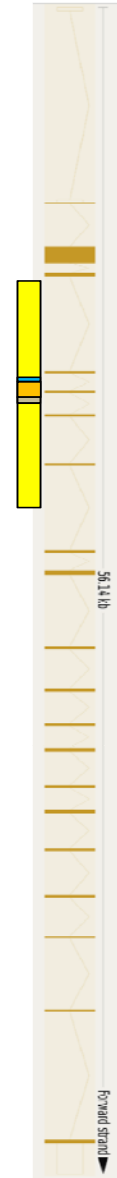

**b**

(Start of ATG codon is position +1)

| Regions in different alleles          |                    |      | WT    |       | KO1 (tm1a) |       | Null-Z (tm1b) |       | Floxed (tm1c) |       | Null (tm1d) |       |
|---------------------------------------|--------------------|------|-------|-------|------------|-------|---------------|-------|---------------|-------|-------------|-------|
|                                       | Size               |      | Start | End   | Start      | End   | Start         | End   | Start         | End   | Start       | End   |
| 5' to 5' homology arm                 |                    |      |       | 3622  |            | 3622  |               | 3622  |               | 3622  |             | 3622  |
| 5' homology arm                       | 4995               |      | 3623  | 8617  | 3623       | 8617  | 3623          | 8617  | 3623          | 8617  | 3623        | 8617  |
| "I5" (replaced intron 5 fragment)     | 58                 |      | 8618  | 8675  |            |       |               |       |               |       |             |       |
| SA-βgeo-pA cassette<br>(7122bp total) | 5'end              | 64   |       |       | 8618       | 8681  | 8618          | 8681  | 8618          | 8681  | 8618        | 8681  |
|                                       | FRT(1)             | 48   |       |       | 8682       | 8729  | 8682          | 8729  | 8682          | 8729  | 8682        | 8729  |
|                                       | En2-SA-RES-lacZ-pA | 4999 |       |       | 8730       | 13728 | 8730          | 13728 |               |       |             |       |
|                                       | loxP(1)            | 34   |       |       | 13729      | 13762 |               |       |               |       |             |       |
|                                       | bAp-Neo-pA         | 1823 |       |       | 13763      | 15585 |               |       |               |       |             |       |
|                                       | FRT(2)             | 48   |       |       | 15586      | 15633 |               |       |               |       |             |       |
| critical region (including exon 6)    |                    | 694  | 8676  | 9369  | 15740      | 16433 |               |       | 8836          | 9529  |             |       |
|                                       | loxP cassette      | 23   |       |       | 16434      | 16456 |               |       | 9530          | 9552  |             |       |
|                                       | (80bp total)       | 34   |       |       | 16457      | 16490 | 13729         | 13762 | 9553          | 9586  | 8736        | 8769  |
|                                       |                    | 23   |       |       | 16491      | 16513 | 13763         | 13785 | 9587          | 9609  | 8770        | 8792  |
| "I6" (replaced intron 6 fragment)     | 111                |      | 9370  | 9480  |            |       |               |       |               |       |             |       |
| 3' homology arm                       | 5094               |      | 9481  | 14574 | 16514      | 21607 | 13786         | 18879 | 9610          | 14703 | 8793        | 13886 |
| 3' to 3' homology arm                 |                    |      |       |       |            | 21608 |               | 18880 |               | 14704 |             | 13887 |

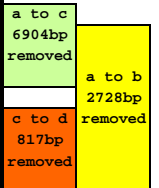

**Fig. S2** Generation of *Kiaa0319*-targeted mice

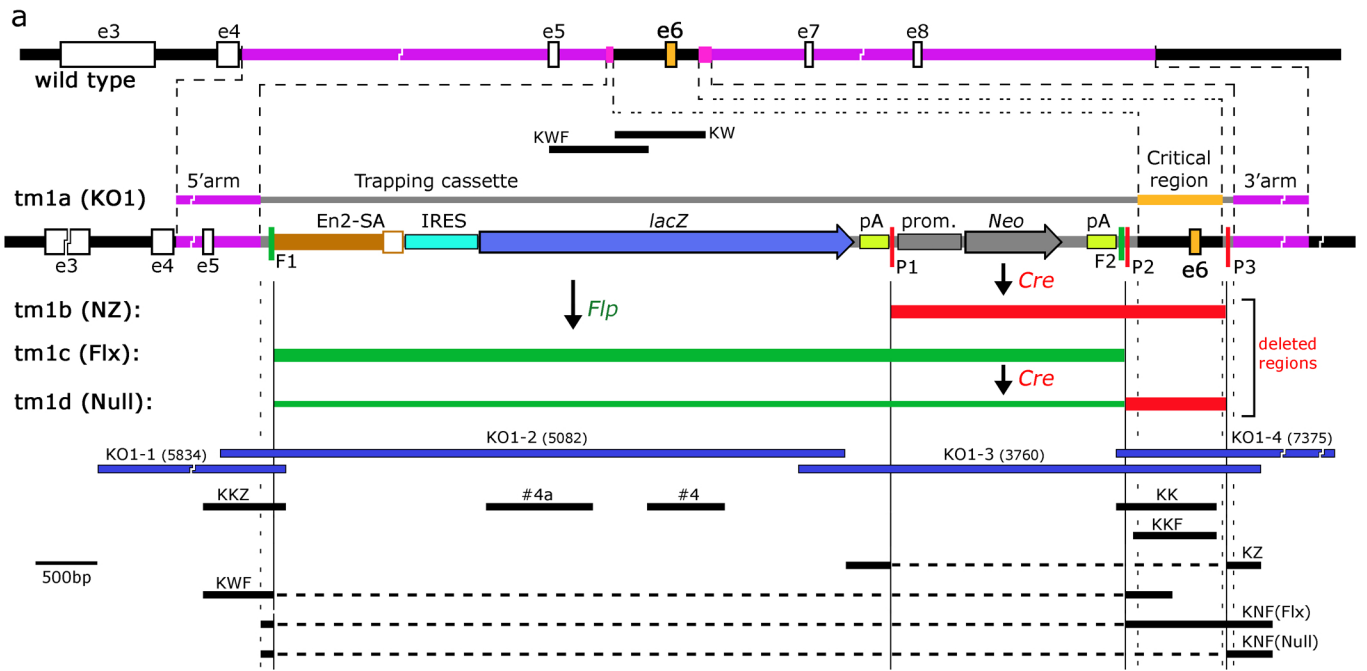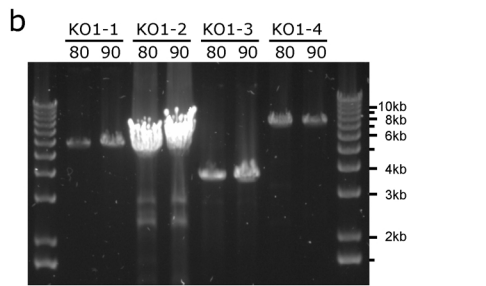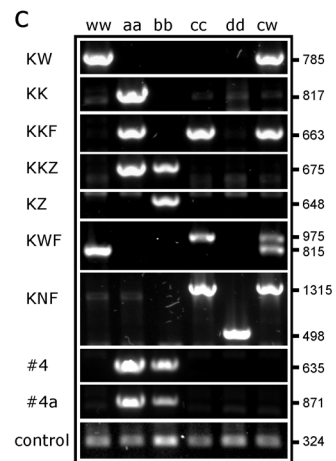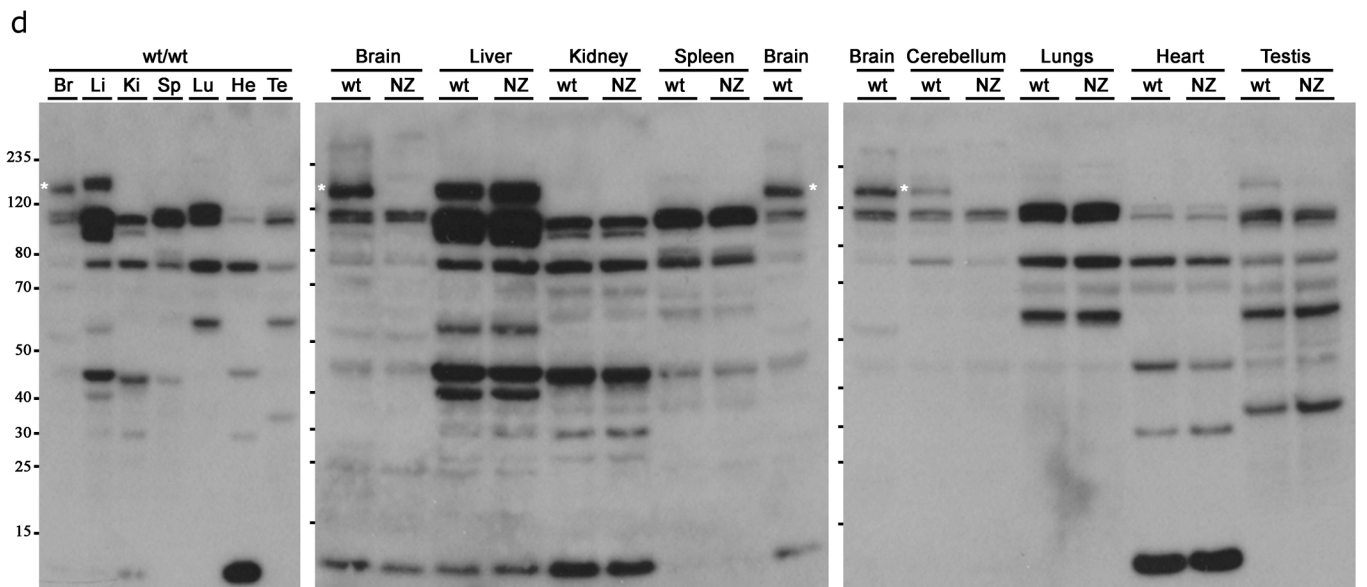

Fig. S3 *Kiaa0319* KO1 allele – Sequence between GF1 and GR1 primers

GF1 CAGACTCTTTCAGGCTAGAGGAACCCAAGGAGGTGTCTCCTAAAGGGCACTACCTCAGGCCGATGCCAGAGGAGGAATGT  
CTGTCAGAGCCTCACCAGGAAACAGAACAGCATTCTTTTGTGTGCTTCCTTCTCTAAGCAGGCAGTTTGGAAAGAACACA  
GAGCTTCCCTCTCCCTAGGTTATCTACCTAAGAGTACCCGTTGAGGACACTAATATTAGGATCCTGTACCACCTCCCAGCT  
CTGCTTCTTGTAAAGCAAGGCATTGGTACTGTTCTTGTAGTGTGTGTCACCCTGATGACCTCTACCTGTCTCTACCT  
CCCCTTTTAAGTGACAGGATTTGGAGACGGTGGGCACAAACAATCCATTGCTAAGCCTTCCCTAGTCTTCATTTTTTTTCC  
ATAACAATATACCCTTGTAAATTCATCCACAGGTTCCAATGCCTTCCCATAACTTCCCTGCCAGCCTGGAGTCTAG  
CCCAGCCACGACGGAACAAAAAATCCAACCTTACAGTCACGCCACGGAGCAGAAAAACAGCACCCCAACTTTTCTTACCA  
GTACAGTCTCTCACTGGGCTAACCCTCCTCCGTGGCCCTTGTACCTACTGCTTCCAGGACAGGTAACCTTCTGAAAACCTG  
TAATTAGAAGACACGTAAGAATCTAGCAGCGACAATGTTTAAAGGTTTTAGTCCCTCCCTTCGGCCCCAGCCTTGAGGCAT  
AACAGTCACAGTGCTATATAACCAAAGGGAAAAGATGAATTGCACTCGGCCTTGTCCCTCTGTGGCTCTGCAGAGCATGA  
GAGGAGACTGACAGGTGGAAAGATGAGGCTGATACTCAGTGGGAAGTGGCGTGAGAGGATGCTCCGGCAGCAGAGGAAGA  
TCGCCTGACCTCCCAGGAGTGCCAGGAAGCCTTCTGGAGGAGGGACTGGCAGGTTAGGGTTAACAGCTCACATGGGTC  
TAGCCTGTTCTATAGTGGGAGCAGCGCATGCTCTAACGGGACGGAGTGTGTATATATTTCTGGTTAATGAACCTCTAGC  
AAGAACACAGGCAGCTGTATTTCTATTTGAGGTGATCTCAATGTGGAGATAAGGGAAGTGTAGAAAGCCTGTCTCTGATG  
CTGGAAGCAGAAGAAACATGACAGGTGAGAAGGGCTGCAGTGTCTCTAGTTTCTAATGCTTCTCTCCATGGGAAAGCA  
CTGAGAGACTGTTGTTTCTGCATCTCAGCACCATGAGTGATCTCTTGCATCATGTGTGGAAGAGAGGTCAGATTTCACAA  
CATTTTGGAAAGAACAGGAGATTGGTTGGCTAGAGCTGGTTTTTGTGAGTAGAGAGGGCAAGATAGGAGTCTAGAATAGGA  
AGGGTTGCCCTAGATTAGTGCCAGGAGCCGTTAAGGAAAAGCTAAAAACTAGCAAGTGATCTTCTTGAGATGGTCCCACCA  
TGGACTATACAGTTAATGATGGATTGCTTCTTCAAACAAGGCAGAGGAGATGTGATTTAAGAAAGTTTTCTGTCTATTA  
ATATCTTTGCTGTTATTTATAAAAAATGTATAACATTCACCTAAGTATTAGCAGATTTTGGAGCAGATTTCTGCAGAACAA  
CAAAAATGTACTGTCTTGGTGTATGCTATATAGACAAATAGATGATTTCTTAATCTTAATTTATGATTTCTATAAGAATTC  
CTAAAATTTAGTTAGTAATTTAGCTCTTTTTATAATAGGACTGCTTTTTAAGTCCTTTCTGATGTCAAAGTACATTGA  
GAAGTGTGCCAGTCTTCAAATGTACCAGTTAATTTGCTTCTGAGATAGCATGAAGGCATCTGTGACTTAGAGCAGCATGCC  
AAGAAGTTGTAACAATAAACTAAAGGTATACAAAGGGAATTGTGGACTTACTCTAGGTGCAAGGACAGAAGATAAAA  
TATTGACTAGGTTTTATCTATACAAACTTCACTAATAACTTAGTCACAAAAGTTATGGTTTTTAATTTCTCCATGAACCTTG  
TAGTGCTGGTGGCAGATGATGAATGTTTAGCCAGATAATTACTCATAATGGATATGCATATAAACCTTCTCATTTTAAAC  
TTCCCTACTCAATTTATGATTTGAATTTATGTTTAACTTCTAGTGAACCTTTGTAAGAAAGTGGTGCTTGGAAAAATCAT  
GTGATCTGTGCTCCTAGAAAAGGTACAAAAGACTAAGAAAGACTACATTTGGACGTTATAATATTGAAGAGATAGCATT  
GGGAACATAGCATTTGGGAGCAAGGCATTTGGGAGTGGGGCATTGTTACATCAGAGCAGGAGGAGAGAGCACAATTAGGAG  
GAGAAATGCAGAGTGAATAACTTAAAAATATAGCCTCATGGGGTGTTCCTATGATCGACTGACCGAAGAGGAGAAGACT  
AGAGCCTGGTTTACTGATGGCTCTGCAGGTTATGCAGGCACCACCAGAAAGTGGACAGCTGCAGCATTACAACCCCTTTC  
TGGGACAACCTTGAAAGACACAGGTGAAGGGAAATCTTACAGTGGGCAGAACTTCGGGCAGTACACATGGTATTACAGT  
TTGTTTGAAGAAGAAGTGGCCAGATGTACAATTAATCACTGACTCATGGGCTGTAGCCAATGGATTGGCTGGATGGTCA  
GGCACTTGGAAAGATCACAAATGGAAAATGGAAAGAAAGGCAACTTAAAAATTAAGAGCAATATATAATGCAGAGGGAA  
AGAAGAAAAAGAAGAAGCTGTAGAGAGAGCAGAAGGAGCAGGAAGGCTTCTCCTTACCATGGGACAGAACAGTTCTTTT  
CTTAAAAACAAGGCAGGTTTAGTCTTACTAAAGGGAACAAGCTTCTTCTTACAGACTTGGGTTTAAATTCATTTAGCAA  
TAAAAGCGTAGAAGCCTTTTCTTTCCCATGCAATAAAGATTGGAGCTCATTTTTTATCCAGAATGAGTGGATTCTTTTT  
GCACTGGTGTCTTGGTCTTTTGTCTCGATATATACATATAAGTATGAATGTGTGTGTTTGTATAGATGTGTATGAATTTATG  
AGATAGCATGTAAGCTGAGCCCAACTGGTTTTGAATGGAGATTTAAGAAATGTGATGATGATGATGATGATGATGATGATG  
TAAGTTTAAATCCATATTTGCTTGTGTAAAAATTTTTCTTCTACGAGTGTGACTCTCTTCTCTTGGTTCAATAGAAGTTT  
ATTGCTCCAAACTTCCCTTAGCCTGACAAGCAAGAGGCATCCAGACCAGAGGGGAAAGACTCTAGCAATTAATCCTTTA  
CTTAATTTCCCAATCCTCCTTTTCTTAAAGAATTTTTCATAGGAACTTTTTAGAGAGAACATAGAAATAAAGGATGAAAT  
CACGTTTCAATGTGTAGCAGGCAGGGAGTTAGAGCTGAGCAGTTCCTGTGGAGGTAGAACAAAGGCTACTTTACTTAAAT  
CCCCTGGTGTTTTTATGATGAGGTAGGTGCTGAATACCAGAGACTGCAGCTTCCGGCCTCAGTGGAACTCAGGCAGGTCTG  
CTACTGACACAAAGTGACTTAGACTTAAAGGTAGGTGTTATAAAGCAACCCTAAATATCTGTAAGATCAAGTCTTACTCCT  
GTCGATGCTCCCTCGGCTGCCCTCATGAAGAACCAAGAAGAACGAAGAACAGCCAGGGCTGCCCCCGTTCCCATCCCACCC  
CAGATTAGGTTTCGATGGAGTGGGAAGACCTTAACTTTGAGCAGCACCCTCCATGAGCCAGGGACCGGAAGGCATCAAAA  
AGGAACCGGAGCACCAGCATTACCTCTCTCTGCCTCCTGGCTGTAGACAGGGCGTGGTCCAGCCGCTCCCAGCCCTGC  
TGCCTCAGATGGACTGGACCTGCCACACTGCGAGCAAAAATAAACCTTCTCCTCAAGTTGCTTCTGCCAGGCATTTT  
GTTACAGCAAGAAAATTAGATAAAAAACCAGACTAAGTCCAGAAGGCCAGTGGGGGTTAATGCTTCCACACCAACTTGAAT  
ATGAGGGTGGCTATAGCTACAGCTCATTTCAAAGGGTGTAGGTGGGCGTGAAGGTGCAAGTCTGTATCCAGCAGCTCGGG  
AAATGGAGGCAGGAGGACCAGGAGTTCAAGATCATCCCTGACTACATACGGAATAAGAAACCAGCCTGGACTGTACAAGA  
TTCTGTATCAAATAATAGTAATACCACCGTCACTCCCTGCCTGCCATAAAGCTTCAGCCACATTTGAAACCTGACTGGTA  
TCGGAGATGCACCGAGAAGTGGTCCGACTCGGTTTTGATTCCTGGTGTCCCTAACCTCCAATTTATGACTTTGCTCC  
TGAACCTCAGTGAGAAGAGGATTTGTGGTGAAGAGAAGCTGTGTAGAGAGAGAGAACTGCCCTGGGTTGGGATCCCTGA  
CTGCTAATGGTGTATACAGAATTTGGGGTATCTTTGAGAATGGCAGAGATCTTTGATAAGCTTGGATGGGGCAGAGGG  
GCCAGAGTCACAGAAAACCTCAATTCACATAGTGTTTTTCTGAACCAAATATGAATGAAACTAATGCCAATTGAGGCAA  
ACCTCCGAAGCCATAGTAGGAGATATGGATGCCGTTTCAAGTTGTACAGTGAATGAGCTCTGCTGCATTAGCAGGTGACA  
GCTTTTGGTGGAGTAAATGTCCCTGCTGCTGCTGGAGTTAAATTTCTTCTCATACTGAGCTTGCCTGGATTTCTGTT  
GGAAAAGCTCCAAGAGCAAGGCCATTAGCAGCCACTTACAAGGAGCTCCCGGATCCAAGCAGCGTGGCTGATGACACTGA  
GACACTGATGAGCACTCTTGACCTTCTGTAAGGAAGGACCGCTCACCAGGGAGTCAGGAAAAAAGCTGGTTGCAACAGA  
GAAAACAGTAGTCTTCCCTACTGGTAAAACCTGTCACCAACACACCGGCTCGTTCTGGATGGTTATTTTCTTCTGGT  
GCCAATCCTGTAGGAAGTTTTAACTTGGCAAAGCCTATCTTGTAGCATAACAGAGCATACTGGCCCAAGGTGGGGTGC

Exon 4



mK5F TTAGGTAATAATTATATGAGGAGTGATCATTCTAAGAACGGGTATATCTATAGAGACAGGGTAAATACTGTATTGGGTAAT  
GGCATGCACTGTTCTATTGAACTTTTTTAGTAAAGGCGCTTGCTGTGTCTGCTGGAGATAACCTAGTACTAACCCTTACCG  
mKi5F1 GACAGAGAAGCAGAAGCTGAAGGCCTCTGTTGAACCAGCGCCCCCTGCAGGTGAGAGTCTGGTGTCTTATGTGACTCCGA  
ACTGGTAGAGCTCAGGCATTCTCTGAGCCACTACCCGGCTATCAAAGGCTTCAGACAACCTTGTAGTTCAAGAGATGCTT  
AGGTGACATTTTAGACAAAACCCCTATAAAAAATCAAGTGCCTGAAACCTATTTGCTTTTTCTTTTTTTCTTTTGGTTTTT  
CGAGACAGGCTTTCTCTGTGTAGCCCTGACTGTCTTGGAACTCAGTTTGTAGACCAGGCTGGCCTCGAACTCACACATCC  
GCCTGTCTCTGCCTCCCAAGTGTGGGATACAGGCGTGCGCCACCACCGCCAGCTTCTGCTTTTCATCAAAGGAGAA  
AAGATACAGTGAATTACACAGTTTAAGTGT

Exon 5

5' arm

Trapping cassette

SA-F1 AAGGCGCATAACGATACCACGATATCAACAAGTTTGTACAAAAAAGCAGGCTGGCGCCGGAACC**GAAGTTCCTATTCCGA**  
**AGTTCCTATTCTCTAGAAAATATAGGAACCTC**GAACCCTTTCCACACCACCCTCCACACTTGCCCCAAACACTGCCAAC  
**TATGTAGGAGGAAGGGTGGGACTAACAGAAGAACC**GGT**TGTGGGG**AAGCTGTTGGGAGGGTCACTTTATGTTCTTGCC  
**CAAGGTCAGTTGGGTGGCCTGCTTCTGATGAGGTGGTCCCAAGGCTCGGGGTAGAAGGTGAGAGGGACAGGCCACCAAGG**  
**TCAGCCCCCCCCCTATCCCATAGGAGCCAGGTCCTCTCCTGGACAGGAAGACTGAAGGGGAGATGCCAGAGACTCAG**  
**TGAAGCCTGGGGTACCCTATTGGAGTCTTCAAGGAAACAAACTTGGCCTCACAGGCCTCAGCCTTGGCTCCTCCTGGG**  
**AACTCTACTGCCCTTGGGATCCCTTGTAGTTGTGGGTACATAGGAAGGGGGACGGGATTCCCCTTGACTGGCTAGCCT**  
**ACTCTTTCTTTCAGTCTTCTCCATCTCCTCTCACCTGTCTCTCGACCCTTCCCTAGGATAGACTTGGAAAAAGATAAGG**  
**GGAGAAAACAAATGCAAACGAGGCCAGAAAGATTTGGCTGGGCATTCCTCCGCTAGCTTTTATTGGGATCCCCTAGTT**  
**TGTGATAGGCCTTTTAGCTACATCTGCCAATCCATCTCATTTTACACACACACACACCCTTCTTCTGGTCAGTGGG**  
**CACATGTCCAGCCTCAAGTTTATATCACACCCCCAATGCCCAACACTTGTATGGCCTTGGGCGGGTCATCCCCCCCC**  
**ACCCCAAGTATCTGCAACCTCAAGCTAGCTTGGGTGCGTTGGTTGTGGATAAGTAGCTAGACTCCAGCAACCAAGTAACT**  
**CTGCCCTTTCTCCTCCATGACAACCAG**GTCCAGGTCCTCGAAAACCAAAGAAGAAGAACCTAACAAAGAGGACAAGCGG  
**CCTCGCACAGCCTTCACTGCTGAGCAGCTCCAGAGGCTCAAGGCTGAGTTTTCAGACCAACAGGTACCTGACAGAGCAGCG**  
**GCGCCAGAGTCTGGCACAGGAGCTCGGTACC**CGGAAGATCTGGACTCTAGAGAATTCGCCCCCTCTCCCTCCCCCCCC  
**TAACGTTACTGGCCGAAGCCGCTTGGAAATAAGGCCGGTGTGCGTTTGTCTATATGTTATTTTCCACCATATTGCCGTCTT**  
**TTGGCAATGTGAGGGCCCGGAAACCTGGCCCTGTCTTCTTGACGAGCATTCTTAGGGTCTTTCCCTCTCGCCAAAGGA**  
**ATGCAAGGCTGTGTAATGTCGTGAAGGAAGCAGTTCCTCTGGAAGCTTCTTGAAGACAAACAACGTCTGTAGCGACCCT**  
**TTGCAGGCAGCGAACCCCCACCTGGCGACAGGTGCCCTCTGCGGCCAAAAGCCACGTGTATAAGATACACCTGCAAAGG**  
**CGGCACAACCCAGTGCCACGTTGTGAGTTGGATAGTTGTGGAAAGAGTCAAATGGCTCTCCTCAAGCGTATTCAACAAG**  
**GGGCTGAAGGATGCCAGAAGGTACCCCATTTGTATGGGATCTGATCTGGGGCCTCGGTGCACATGCTTTACATGTGTTA**  
**GTCGAGGTTAAAAA**CGTCTAGGCCCCCCGAACCACGGGGACGTGGTTTTCTTTGAAAAACACGATGATAAGCTTGCC  
**CAACCATGGAAGATCCCCTCGTTTTTACAACGTCGTGACTGGGAAAACCTGGCGTTACCCAACCTTAATCGCCTTGACG**

FRT

LAR3

En2  
intron\_1/  
exon\_2'

IRES

lacZ-F3 ACATCCCCCTTTCGCCAGCTGGCGTAATAGCGAAGAGGCCCGCACCCGATCGCCCTTCCCAACAGTTGCGCAGCCTGAATG  
GCGAATGGCGCTTTGCCCTGGTTTCCGGCACCGAAGCGGTGCCGGAAGCTGGCTGGAGTGCATCTTCTGAGGCCGAT  
ACTGTCGTCGTCCTCCCTCAAACCTGGCAGATGCACGGTTACGATGCGCCCATCTACACCAACGTGACCTATCCCATTACGGT  
CAATCCGCCGTTTGTTCACGGAGAATCCGACGGTGTACTCGCTCACATTTAATGTGATGAAAGCTGGCTACAGG  
AAGCCAGACGCGAATATTTTTGTATGGCGTTAATCTCGGCTTTCATCTGTGTTGCAACGGCGCTGGGTGGTTACGGC  
CAGGACAGTCGTTTGGCGTGAATTTGACCTGAGCAGTTTTTACCGCCGGAGAAAACCCGCTCGCGGTGATGGTGTCT  
GCGTGGAGTGCAGCGCTTATCTGGAAGATCAGGATATGTGGCGGATGAGCGGCATTTTCCGTGACGTCTCGTTGCTGC  
ATAAACCAGCTACACAAATCAGCGATTTCCATGTTGCCACTCGCTTTAATGATGATTTAGCCGCGCTGTACTGGAGGCT  
GAAGTTCAGATGTGCGCGAGTTGCGTGACTACCTACGGGTAACAGTTTCTTTATGGCAGGGTGAAACGCAGGTGCCAG  
CGGCACCGCGCTTTCGGCGGTGAAATATCGATGAGCGTGGTGGTTATGCCGATCGCGTCACACTACGTCTGAACGTG  
AAAACCCGAAACTGTGGAGCGCCGAAATCCCGAATCT**CTATCGTGGCGTGGTTGAAC**TGCACACCGCCGACGGCAGCGTG  
ATTGAAGCAGAAGCCTGCGATGTGGTTTCCGCGAGGTGCGGATGAAAATGGTCTGCTGCTGCTGAACGGCAAGCCGTT  
GCTGATTCGAGGCGTTAACCGTCACGAGCATCATCTCTGCATGGTCAGGTATGGATGAGCAGACGATGGTGCAGGATA  
TCCTGCTGATGAAGCAGAACAATTTAACGCCGTGCGCTGTTTCGATTATCCGAACCATCCGCTGTGGTACACGCTGTGC  
GACCGCTACGGCCTGTATGTGGTGGATGAAGCCAATATTGAAACCCACGGCATGGTGCCAATGAATCGTCTGACCGATGA  
TCCGCGTGGCTACCGCGATGAGCGAACCGGTAACCGCAATGGTGCAGCGCGATCGTAATACCCGAGTGTGATCATCT  
GGTCTGCTGGGGAATGAATCAGGCCACGGCGCTAATCACGACGCGCTGTATCGCTGGATCAAATCTGTGATCCTTCCCGC

lacZ

lacZ-R3

lacZ-F8 CCGGTGCAGTATGAAGGCGGCGGAGCCGACACCACGGCCACCGATATTTTGGCCGATGTACGCGCGCTGGATGAAGA  
CCAGCCCTTCCCGCTGTGCCGAAATGGTCCATCAAAAAATGGCTTTCGCTACCTGGAGAGACGCGCCCGCTGATCCTTT  
GCGAATACGCCACCGCATGGGTAACAGTCTTGGCGGTTTCGCTAAATACTGGCAGGCGTTTCGTGATATCCCGTTTA  
CAGGGCGCTTCGCTGGGACTGGGTGGATCAGTCGCTGATTAATATGATGAAAACGGCAACCCGCTGGTTCGGCTACGG  
CGGTGATTTGGCGATACGCCAACGATCGCCAGTCTGTATGAACCGTCTGGTCTTTGCCGACCGCACCGCATCCAG  
CGTGTACGGGAAGAAAACCCAGCAGCAGTTTTTCCAGTTCGCTTTATCCGGCAAAACCATCGAAGTACCGCATCAAC  
CTGTTCCGTCATAGCGATAACGAGCTCCTGCACCTGGATGGTGGCGCTGGATGGTAAGCCGCTGGCAAGCG**GTGAAGTGCC**  
**TCTGGATGTC**CGCTCCACAAGGTAACAGTTGATTGAACCTGACCTGAACTACCGCAGCCGGAGAGCGCCGGGCAACTCTGGC  
TCACAGTACGCGTAGTGCAACCGAACGCGACCCGATGGTGCAGAAGCCGGGCACATCAGCGCCTGGCAGCAGTGGCGTCTG  
GCGGAAAACCTCAGTGTGACGCTCCCCGCGCGTCCACGCCATCCCGCATCTGACCACCAGCGAAATGGATTTTTCAT  
CGAGCTGGGTAATAAGCGTTGGCAATTTAACCGCCAGTCAGGCTTCTTTTACAGATGTGGATTGGCGATAAAAAACAAC  
TGCTGACGCCGCTGCGCGATCAGTTACCCGCTGCACCGCTGGATAACGACATTGGCGTAAGTGAAGCGACCCGCTTAC  
CCTAACGCTGGGTGCAACGCTGGAAGGCGGCGGGCCATTACCAGGCCGAAGCAGCGTTGTTGACGTGCACGGCAGATA  
ACTTGTGATGCGGTGCTGATTACGACCGCTCACGCGTGGCAGCATCAGGGGAAAACCTTATTTATCAGCCGAAAACCT  
ACCGGATTGATGGTAGTGGTCAAATGGCGATTACCGTTGATGTTGAAGTGGCGAGCGATACACCGCATCCGGCGCGGATT  
GGCCTGAACTGCCAGCTGGCGCAGGTAGCAGAGCGGGTAAACTGGCTCGGATTAGGGCCGCAAGAAAACCTATCCCGACCG  
CCTTACTGCCGCTGTTTTGACCGCTGGGATCTGCCATTGTCAGACATGTATAACCCGTACGTCTTCCCGAGCGAAAACG

lacZ-R5

lacZ-F1 ACCGATTGATGGTAGTGGTCAAATGGCGATTACCGTTGATGTTGAAGTGGCGAGCGATACACCGCATCCGGCGCGGATT  
GGCCTGAACTGCCAGCTGGCGCAGGTAGCAGAGCGGGTAAACTGGCTCGGATTAGGGCCGCAAGAAAACCTATCCCGACCG  
CCTTACTGCCGCTGTTTTGACCGCTGGGATCTGCCATTGTCAGACATGTATAACCCGTACGTCTTCCCGAGCGAAAACG

lacZ-F2 GTCTGCGCTGCGGGACGCGGAATTGAATTATGGCCACACCAGTGGCGCGGCGACTTCCAGTTCAACATCAGCCGCTAC  
 AGTCAACAGCAACTGATGAAACCAGCCATCGCCATCTGCTGCACGCGGAAGAAGGCACATGGCTGAATATCGACGGTTT  
 CCATATGGGGATTGGTGGCGACGACTCCTGGAGCCCGTCAAGTATCGGCGGAATTCCAGCTGAGCGCCGGTCTGCTACCATT  
 ACCAGTTGGTCTGGTGTCAAAAAATAAATAAACCCGGGCAGGGGGGATCTAAGCTCTAGATAAGTAATGATCATAATCAGC  
 CATATCACATCTGTAGAGTTTTTACTTGCCTTTAAAAAACCTCCCACACCTCCCCCTGAACCTGAAACATAAAATGAATGC  
 AATTGTTGTTGTTAACTTGTATTATGCAGCTTATAATGGTTACAAATAAAGCAATAGCATCACAAATTTACAAATAAAG  
 CATTTTTTTTCACTGCATTCTAGTTGTGGTTTGTCCAAACTCATCAATGTATCTTATCATGTCTGGATCCGGAATAA  
 ACTTTCGTATAGCATAACATTATACGAAGTTATGTTTAAACGGCGCGCCCGGAATTCGCCTTCTGCAGGAGCGTACAGA  
 ACCCAGGGCCCTGGCACCCTGTCAGACCCTGGCCACCCACCTGGGCGCTCAGTGCCCAAGAGATGTCCACACCTAGGATGTCCCG  
 CGGTGGGTGGGGGGCCGAGAGACGGGCAGGCCGGGGGAGGCCCTGGCCATGCGGGGCCGAACCCGGGCACTGCCAGCGT  
 GGC<sub>9</sub>CGCGGGGGCCACGGCGCGCCCCAGCCCCGGGCCAGCACCCCAAGGCGGCCAACGCCAAAACCTCTCCCTCCT  
 CCTCTTCTCAATCTCGCTCTCGCTCTTTTTTTTTTTTTCGCAAAGGAGGGGAGAGGGGGTAAAAAATGCTGCAGTGTGC  
 GGCGAAGCCGGTGTAGTGTAGCGCGCGGGGCCAATCAGCGTGCGCCGTTCCGAAAGTTGCCTTTTATGGCTCGAGCGGCCG  
 CGGCGCGCCCTATAAAACCCAGCGGCGGACGCGCCACCACCGCCGAGACCGCGTCCGCCCCGCGAGCACAGAGCCTCG  
 CCTTTGCCGATCCTCTAGAGTGTAGATCCGCCGCCACCATGATTGAACAAGATGGATTGCACGCAGGTTCTCCGGCCGCT  
 TGGGTGGAGAGGCTATTCCGCTATGACTGGGCACAACAGACAATCGGCTGCTCTGATGCCGCCGTGTTCCGGCTGTCAAG  
 GCAGGGGCGCCCGGTTCTTTTTGTCAAGACCGACCTGTCCGGTGCCTGAATGAACTGCAGGACGAGGCAGCGCGGCTAT  
 CGTGGCTGGCCACGACGGGCGTTCCTTGCAGCTGTGCTCGACGTTGTCACTGAAGCGGGAAGGGACTGGCTGCTATTG  
 GCGAAGTGCCGGGGCAGGATCTCCTGTATCTCACCTTGTCTTCCGAGAAAGTATCCATCATGGCTGATGCAATGCG  
 GCGGCTGCATACGCTTGATCCGGCTACCTGCCATTGACACCAAGCGAAACATCGCATCGAGCGAGCAGTACTCGGA  
 TGGAAAGCCGGTCTTTGTGATCAGGATGATCTGGACGAAGAGCATTAGGGGCTCGCGCCAGCCGAACGTTCCGACGGCTC  
 AAGGCGCGCATGCCGACGGCGAGGATCTCGTCTGACCCATGGCGATGCCTGCTTGCGAATATCATGGTGGAAAATGG  
 CCGCTTTTCTGGATTATCGACTGTGGCCGGCTGGGTGTGGCGGACCGCTATCAGGACATAGCGTTGGCTACCCGTGATA  
 TTGCTGAAGAGCTTGGCGGCAATGGGCTGACCGCTTCTCCTGTGCTTACGGTATCGCCGCTCCCGATTTCGACGCGCATC  
 GCCTTCTATCGCCTTCTTGACGAGTCTTCTGAGCGGGACTCTGGGGTTCGAAATGACCGACCAAGCGACGCCAACCTG  
 CCATCACGAGATTTGATTTCCACC GCCCTTCTATGAAAGGTTGGGCTTCGGAATCGTTTTCCGGGACGCCGGCTGGAT  
 GATCCTCCAGCGGGGATCTCATGCTGGAGTCTTCCGCCACCCCGGATCTAAGCTCTAGATAAGTAATGATCATAA  
 TCAGCCATATCACATCTGTAGAGTTTTACTTGCCTTTAAAAAACCTCCCACACCTCCCCCTGAACCTGAAACATAAAATG  
 AATGCAATTGTTGTTGTTAACTTGTATTATGCAGCTTATAATGGTTACAAATAAAGCAATAGCATCACAAATTTACAAA  
 TAAAGCATTTTTTTCACTGCATTCTAGTTGTGGTTTGTCCAAACTCATCAATGTATCTTATCATGTCTGGATCCGGGGGT  
 ACCGCGTCTGAAGTTCCTATTCCGAAGTTCCTATTCTCTAGAAAGTATAGGAACCTTGTGAGATAA  
 CTTTCGTATAGCA  
 TACATTATACGAAGTTATGTCGAGATATCTAGACCAGCTTTCTTGTACAAAGTGGTTGATATCTCTATAGTGCAGTAG  
 GCGG

PNF  
 R2R

mKi5F3  
 ATTCGGACCTAGTGAGGTTGAAGACACTTCAGTCTACTATATAGTGAGCTCCAGGCCAGCCAGAGCTCACAGTGAGAGCC  
 TGTCTCAAAACAACAAGAAGGAATTATATGGATAATCAGGTGTTGGCAAGAGCCCAGAAGGAAGGTTTTCAAATGCT  
 AATAGTAAAAGTTGGGGAGTTTTAATTTTTAGTCCCCATTTTCTATCATTGTGTACTTTTATTATCAGTTGTTTTGTG  
 TTTGTTTTGTTCTTCTTCAATGACAAAGGACACAGAGACCGGAGATTCTCTCTGGGACGAGCCTTGAAGCAGAGCTCTGT  
 GTTTCTAAGGCAGTTGATGCTGTGGTTTTAAAGCATTCTCCTTAGGGTTATAAGGTGACCTCTCAGATCTGATAAGC  
 ATTCGTGTTTTCCCTCAGATACAACCTTACTCCTATGAATGGAGTTTTAATGAGCCACCAGTAGACTTCCAAGGTAAAATC  
 AAACAAGAAAAAAGCCGACTCTTACCTCTCTCAAGTAAGTAACAAGGCAGGTTGCACAGCTCAGACTCCAGTGAGCAA  
 AGTCTTGGCTGTTGAATGCAGAATTCGTTTTAGGATTAAGAGTGGATAAAGGAGCCCGGCATGATGGATGGCATGTGCC  
 TGCAGTGTATCTACTTAAAAGTGAGG<sub>9</sub>CAAAAGATTGCTTCGTCTTAGAAGTT

loxP cassette  
 loxP3R  
 3' arm  
 mKi6R3  
 mKi6R4  
 Exon 6  
 Exon 7

GAGATGGCGCAACGCAATTAATGATAA  
 ACTTTCGTATAGCATAACATTATACGAAGTTATGGTCTGAGCTCGCCATCAGTTCA  
 TCAGTAGCCTTCCTCATTGCAATTGCTTGAATAACAGCGCTGAAGAAAGAGGCTGGAGGTTCGGGGCCATAATGTGTGG  
 TAGGTTCAAAGCCTGGGTCTAATTCCTTTCAGTCTTACAGTGTAAAGATATCTCAGGTGTCCACGAGGTATGTTCCGTT  
 TTAGTTTACAAGGTGCTTAGATTGTCAAATACTGCTCCACACAAGAAGACA  
 CATAACCATTTCCTTGGCTCCAAAAGGAAG  
 CTCGGGGTCTGGCTTCTTATGAGGTGACTGTCTTCTGTTC  
 CAAGGCTGTACCAATCCCAGTGACTTACCAGCTCAGGTCA  
 TTGCTGCGTGACTGAGCTATTTCTCCAAGTGTGGTACCCAGACCCCTGCCAGTAACACGTGTTAGAAATCTCTGACTCGA  
 GACCTGTTGCTGGTCAAGTGTAGAGTCCCCTGCTGAGCATAATGTGAGGCCCTGGGCTCACTTGCAGCACTGACTCACCC  
 ACTCCACAAAACCAAGTCCAGCATGATTCATACATGCCATCTGAGGGCTGCTGTCTTGGCTGATTTGAAGTCTGT  
 GACATCTGTTACTAAGCAAAAGCCCTCTGTAGTAACTTAGTATCTTAGAGTGCAGTCTCAAATGTGTAGCAGTCTTAG  
 ACAGACTAAAATGAAGCTTTCTCCCAAGTCTTTGGGGGCATTGTAGGCTTTTCTCGGAGGCAGATGCCCTGTCTTCA  
 TGCTCACTTGTGTATCTGTTTCCATCTTGCAGTTATCTGTGGGACTCTATGCCTT  
 CAGAGTGGCTGTTTCTAGTGAGAAT  
 GCATTTGGAGAAGGCTATGTCAATGTACCGTTATGCCAGGTGAGTCTGTTGGGAGAATGGCATCTTGGCTGTGCTAGTC  
 TCAAGTTCTGGCACCTGGATGACATGGAGGTATAGATTGATGACATGACTGACCCATGGAATGGTGAAGGGGAAAGACTT  
 TACTGTAGTAGATACTGAGGGAGCCTAGAAGCCAGCATGGGCTTTGATATGCTGGTAGGGACCACAAGAAACCATATGTC  
 CCTTTGGCCAGAGGTAAGGTGCCTTTTGGTAGAGGGGAACCTGGCTTCCCAAGTTCCTGAGGAATGCTGGCTTCTACCTA  
 ACCACCAGAAATCTTATAGTTAAGGTTGAGCTCATTTCTGGATATTTGGACTGCCTTTTGGAGTTTGGACCAGACAGTGT  
 TTTAATAACAAACGCTTTTATTTTTTATTTATACAAGTTAGACTTGTGTAGTCTGAAGAGACACCGTGACCAACTCTTAT  
 AAGGCAACTCTTATAAAGGAAAGCAGTTAATTAAGGGCTCGCTTTCCGATT  
 CAGAGGCTTAGGTCATTATCACTGTGGCA  
 GGGAGCATGGCAGCAGCGGCAGGCAGGCAGGCAGGCAGGCAGGCAGGCAGGCAGGTTGGTGTGCTGGAGGAATGGCTGAAAGCTCTGCATC  
 CTGACCCACAGGCAGCAGGTAGGCAGGCAGGCAAGGTGGCAGGTGGGGAGAGGGAAGAGAGGTGGGCCAGGTGTAGGCAT  
 TTGAAACCTCAGTGCCTACCCCCAGTGACACAGTGGCTTCTCCAGCAAGGCCACACTTCTAATCCTTCTCAACAGCC



**Fig. S4** PCR and genotyping details

| Genotyping of mice |                       |         |         | Expected band sizes |      |        |      |      |
|--------------------|-----------------------|---------|---------|---------------------|------|--------|------|------|
| PCR #              | To detect:            | Primers |         | wt                  | tm1a | tm1b   | tm1c | tm1d |
|                    |                       | Forward | Reverse | wt                  | KO1  | Null-Z | Fix  | Null |
| KO1-1              | <i>Kiaa0319 locus</i> | GF1     | LAR3    |                     | 5834 | 5834   |      |      |
| KO1-2              | <i>Kiaa0319 locus</i> | mKi5F1  | lacZ-R7 |                     | 5082 | 5082   |      |      |
| KO1-3              | <i>Kiaa0319 locus</i> | lacZ-F1 | mKi6R3  |                     | 3760 | 1032   |      |      |
| KO1-4              | <i>Kiaa0319 locus</i> | PNF     | GR1     |                     | 7375 |        |      |      |
| KW                 | <i>Kiaa0319 locus</i> | mKi5F3  | mKi6R2  | 785                 |      |        |      |      |
| KK                 | <i>Kiaa0319 locus</i> | PNF     | mKi6R1  |                     | 817  |        |      |      |
| KKF                | <i>Kiaa0319 locus</i> | R2R     | mKi6R1  |                     | 663  |        | 663  |      |
| KKZ                | <i>Kiaa0319 locus</i> | mK5F    | LAR3    |                     | 675  | 675    |      |      |
| KZ                 | <i>Kiaa0319 locus</i> | lacZ-F2 | mKi6R3  |                     | 3376 | 648    |      |      |
| KWF                | <i>Kiaa0319 locus</i> | mK5F    | mKi5R3  | 815                 | 7879 |        | 975  |      |
| KN(F)              | <i>Kiaa0319 locus</i> | SA-F1   | mKi6R4  |                     | 8219 | 5491   | 1315 | 498  |
| 4                  | <i>lacZ</i>           | lacZ-F8 | lacZ-R5 |                     | 635  | 635    |      |      |
| 4a                 | <i>lacZ</i>           | lacZ-F3 | lacZ-R3 |                     | 871  | 871    |      |      |

| PCR # | To detect:                 | Forward  | Reverse  | wt | Flp | Sox2-cre |
|-------|----------------------------|----------|----------|----|-----|----------|
| 5     | <i>Flp insertion locus</i> | oIMR1348 | oIMR1349 |    | 725 |          |
| 6a    | <i>cre insertion locus</i> | Cre-F2   | Cre-R6   |    |     | 820      |
| 6b    | <i>cre insertion locus</i> | Cre-F3   | Cre-R5   |    |     | 600      |
| 7     | <i>cre insertion locus</i> | AGp-F2   | Cre-R2   |    |     | 552      |

|     |                  |          |          |     |     |
|-----|------------------|----------|----------|-----|-----|
| All | Internal control | oIMR7338 | oIMR7339 | 324 | ALL |
|-----|------------------|----------|----------|-----|-----|

| PCR # | To detect:       | Primers |         | Expected band sizes |      |
|-------|------------------|---------|---------|---------------------|------|
|       |                  | Forward | Reverse | Female              | Male |
| Sex a | <i>Sry locus</i> | mSry-F  | mSry-R  |                     | 402  |
| Sex b | <i>Sry locus</i> | mSry-F1 | mSry-R1 |                     | 272  |

|     |                  |       |       |     |     |
|-----|------------------|-------|-------|-----|-----|
| All | Internal control | mL3_F | mL3_R | 544 | 544 |
|-----|------------------|-------|-------|-----|-----|

**Expected PCR results for different *Kiaa0319* allele combinations**

| Gen. # | <i>Kiaa0319 locus</i> |          | PCR # |    |     |     |    |     |        |      |
|--------|-----------------------|----------|-------|----|-----|-----|----|-----|--------|------|
|        | Allele 1              | Allele 2 | KW    | KK | KKF | KKZ | KZ | KWF | KN (F) | 4/4a |
| 1      | wt                    | wt       | +     | -  | -   | -   | -  | +   | -      | -    |
| 3      | KO1                   | wt       | +     | +  | +   | +   | -  | +   | -      | +    |
| 5      | KO1                   | KO1      | -     | +  | +   | +   | -  | -   | -      | +    |
| 13     | Null-Z                | wt       | +     | -  | -   | +   | +  | +   | -      | +    |
| 15     | Null-Z                | Null-Z   | -     | -  | -   | +   | +  | -   | -      | +    |
| 7      | Fix                   | wt       | +     | -  | +   | -   | -  | [+] | [+]    | -    |
| 9      | Fix                   | Fix      | -     | -  | +   | -   | -  | [+] | [+]    | -    |
| 17     | Null                  | wt       | +     | -  | -   | -   | -  | +   | +      | -    |
| 19     | Null                  | Null     | -     | -  | -   | -   | -  | -   | +      | -    |

Note: [+] indicates the bigger band of those that can be obtained from different alleles (pink-highlighted in PCR table)

**PCR profile:**

|      |          |           |
|------|----------|-----------|
| 95°C | 15 min   | 34 cycles |
| 94°C | 30 sec   |           |
| 60°C | 30 sec   |           |
| 72°C | 45 sec   |           |
| 72°C | 10 min   |           |
| 15°C | infinite |           |

Ann. Temp. reduced to 58°C for PCRs #5, #Sex-a and #Sex-b

**Fig. S5** Normal lamination in early developmental stages

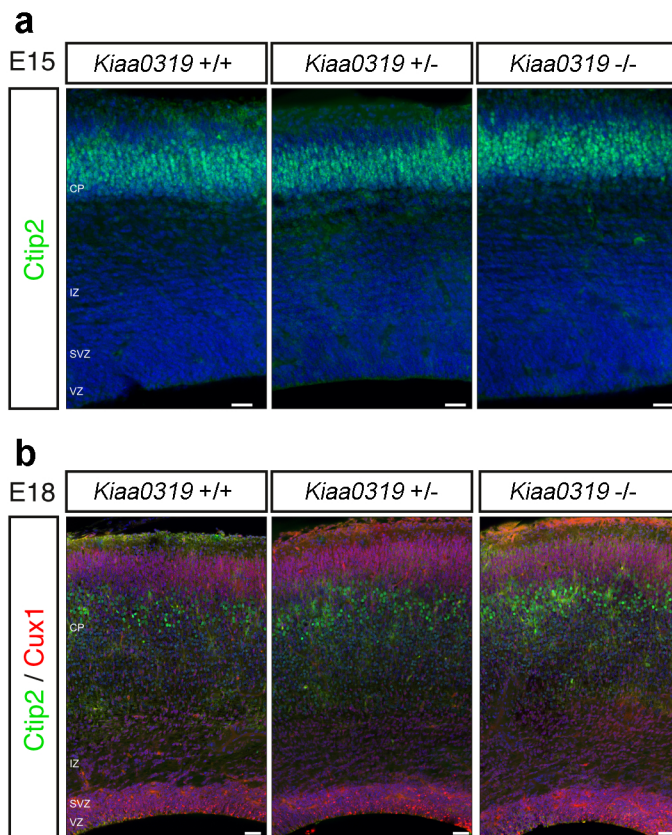

**Fig. S6** Generation of *Null* allele by Cre expression in *Flx* electroporated cells

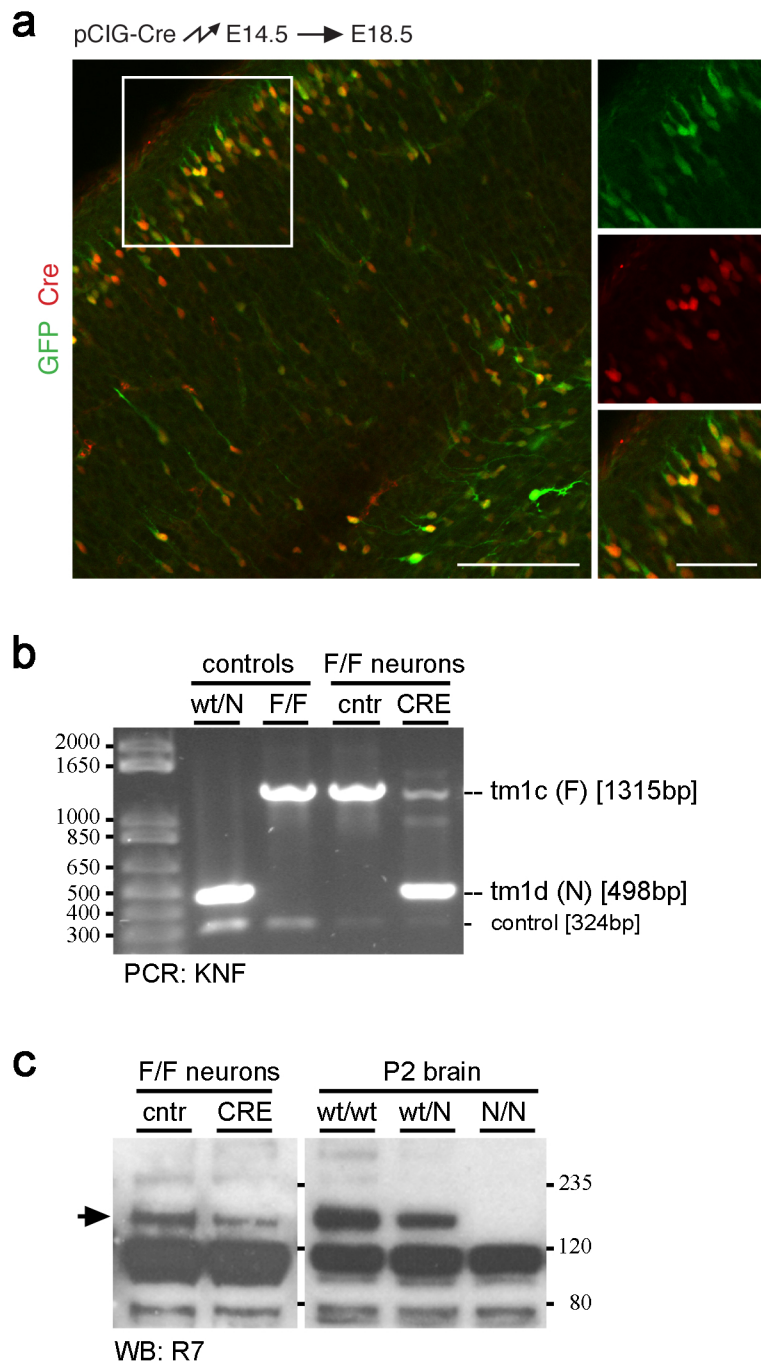

**Fig. S7** Behavioural tests

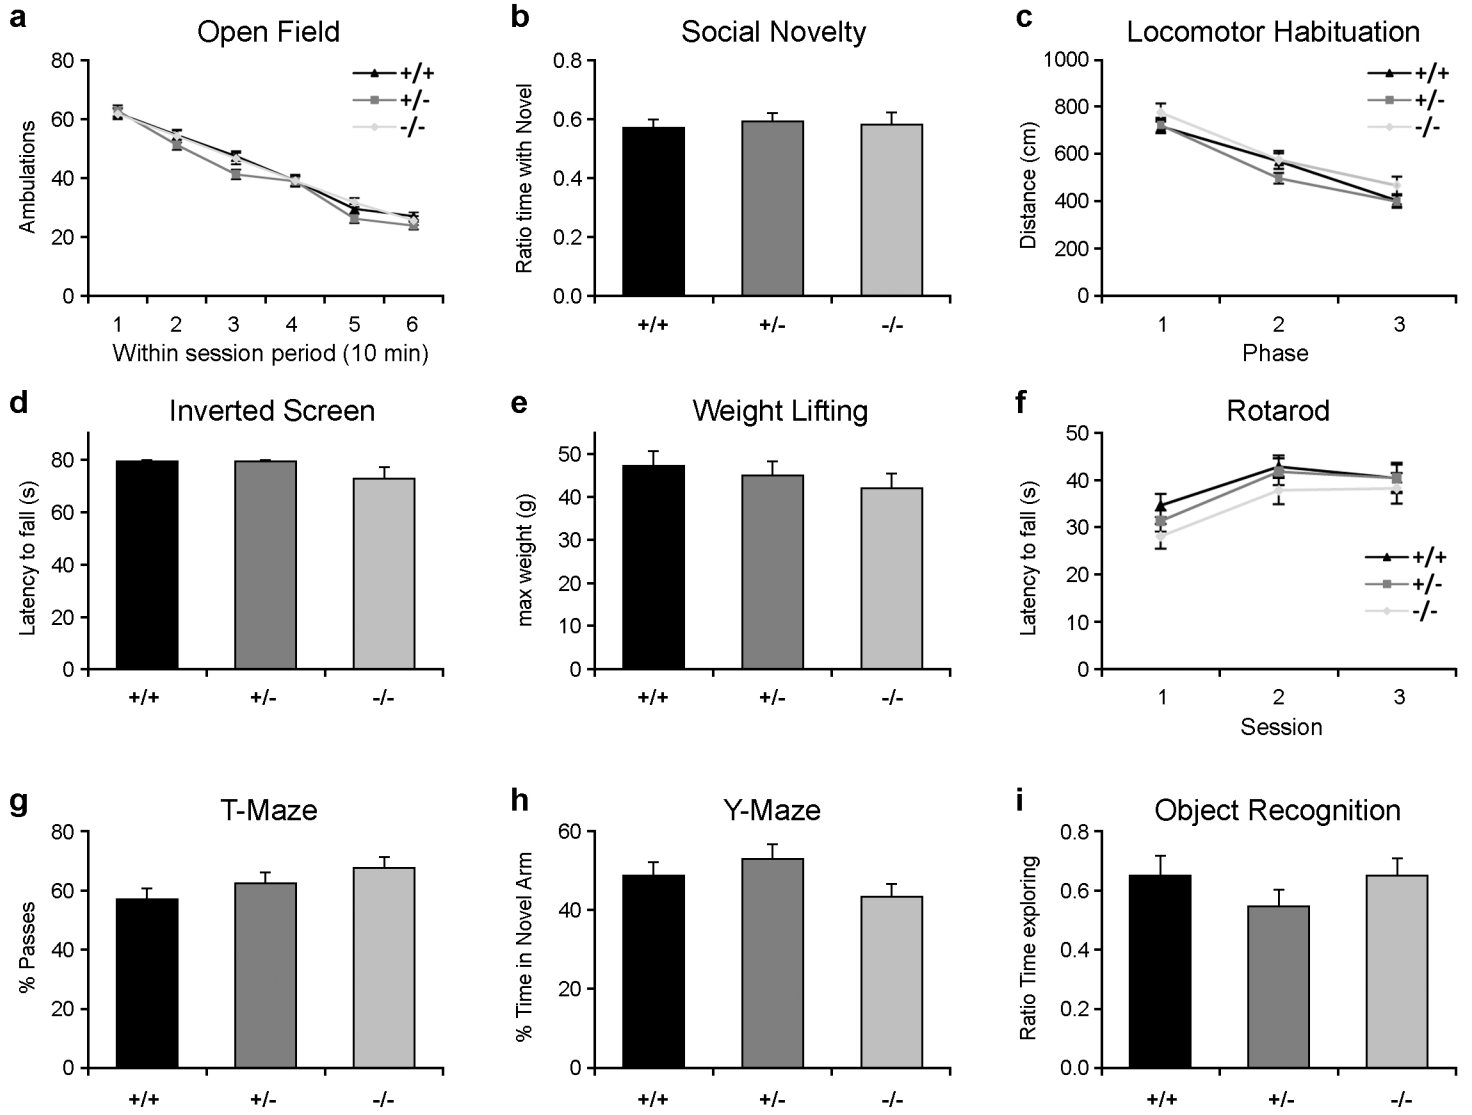

Supplement: 429_2016_1282_MOESM1_ESM.pdf [file 429_2016_1282_MOESM1_ESM.pdf]
